# Supplementary material for: Gender influence on work satisfaction and leadership for medical oncologists: a survey of the Spanish Society of Medical Oncology (SEOM)
Source: PubMed Central journal article supplement — ESMO Open. 2021 Feb 6;6(2):100048. doi: 10.1016/j.esmoop.2021.100048 (PMC7872979; doi:10.1016/j.esmoop.2021.100048), 2021-02-06
Supplement: mmc1.pdf [file mmc1.pdf]

# SEOM Gender Survey

## 1. Demographic data

**Sex:**     M     F

**Autonomous Community:** \_\_\_\_\_

### **Position:**

- Resident
- Fellow
- Attending Physician
- Unit Head
- Head of Department

### **Type of hospital**

- Public
- Private

### **Type of contract**

- Permanent position: Yes/ No
- Other (specify): \_ \_ \_

### **Age**

- <30
- 31-35
- 36-40
- 41-45
- 46-50
- 51-55
- 56-65
- >65

### **Marital status**

- Single
- Married or partnered
- Separated or divorced
- Widow/ widower

**Number of children** \_ \_

## 2. Care

### Number of attending medical oncologists in the department you belong to

- <5
- 6-10
- 11-20
- 20-30
- >30

### How many are male and how many are female?

Fellows and other contracts (specialty, part-time contract, etc.):

Male \_\_

Female \_\_

Residents:

Male \_\_

Female \_\_

Attending medical oncologist:

Male \_\_

Female \_\_

Unit heads:

Male \_\_

Female \_\_

The Head of the Department is:                    - Male                    - Female

### Percentage of time spent on:

- Care: 0-25% 25-50% 50- 75% >75%
- Teaching: 0-25% 25-50% 50- 75% >75%
- Research: 0-25% 25-50% 50- 75% >75%
- Management: 0-25% 25-50% 50- 75% >75%

### What are the 3 aspects of your profession you like most?

- Relationship with patients
- Intellectual stimulation
- The challenge of tackling a difficult disease
- The possibility of working with many specialists
- The prestige of the profession
- Financial aspects

### 3. Research/ Academia

**Are you or have you ever been a Lead Investigator in a competitively funded project?** Yes/ No

(If No) Have you applied for one? Yes/ No

**Would you like to?** Yes/ No

**In the last 5 years, have you headed up a stable research group?** Yes/ No

(If No) Have you ever actively tried to obtain such a position? Yes/ No:.. Reasons:  
.....

(If Yes) Is this position recognized (e.g.: position specifically mentioned in the organizational chart, remunerated, or other kind of recognition)? Yes/ No

**Are you or have you ever been president of a collaborative group?** Yes/ No

(If No) Have you ever actively tried to obtain such a position? Yes/ No

**Are you a university professor?** Yes/ No

(If Yes) Position:

- Associate professor
- Full professor
- Chair

**Are you familiar with the ANECA system of accreditation?** Yes/ No

**Have you ever applied for ANECA accreditation?** Yes/ No

**Are you accredited by ANECA?** Yes/ No.

**Do you hold a doctorate in medicine?** Yes/ No

**Are you working on your doctoral dissertation?** Yes/ No.

(If No):

Lack of time

Lack of interest

Lack of support from my department

Don't know/ No answer

Other

**After completing your residency, have you ever spent time abroad? Yes/ No**

(If Yes) For how long:

(If No), Reasons:

Lack of time

Lack of interest

Lack of support from my department

Don't know/ No answer

Other

## **4. Career**

**Are you satisfied with your career? Yes/ No**

**Do you think that parenthood has had a positive impact on your career?**

N/A

No

Not very much

Very much so

**Do you think that parenthood has had a negative impact on your career?**

N/A

No

Not very much

Very much so

**Rank from 1 to 3 (1 being the most important and 3 the least important) the three obstacles you believe hinder progress in your career the most?**

- Work-life balance
- Family life organization
- Scant visibility in the oncology community
- Gender
- Difficulty qualifying to complete training in high-level national or foreign centers
- Low pay
- Lack of mentors
- Other...

**How much do you believe that your gender has affected your career?**

- I don't know
- No impact
- Minor impact
- Moderate impact
- Significant impact

## **5. General questionnaire**

**Based on your knowledge and personal experience, what are the three main hurdles that keep gender equality from being achieved in the field of oncology?**

- Bias among your colleagues and/ or superiors (conscious or unconscious)
- Lack of work-life balance
- Lack of role models
- Less skilled
- Women's lack of confidence
- Different aspirations
- Social pressure
- Less well-defined career paths
- Less leadership abilities in women
- Women lack self-confidence in their own abilities
- Lack of support from partner/ personal surroundings
- I don't know
- There are no barriers
- None of the above
- Other (specify):

**Have you experienced any of these situations first-hand (indicate the following choices where appropriate)?**

- Inappropriate behavior due to issues of gender or sexual orientation
- Sexist or derogatory comments toward yourself due to gender
- I have not suffered or witnessed any of these attitudes

**Which of the following programs specifically targeting professional women would you recommend SEOM implement or try to promote to the corresponding institutions to support female oncologists' professional development? (choose up to 3)**

- Tutoring program
- Network of female oncologists
- Childcare at conferences
- Flexible educational/ scholarship programs
- Bonus for returning to the workplace after maternity leave
- Design or collaboration in specific educational programs for skills training (communication, leadership, etc.)
- Implementation of quotas to increase women's representation
- Other (please specify)
